# Supplementary material for: Changes in the quality of doctor–patient communication between 1982 and 2001: an observational study on hypertension care as perceived by patients and general practitioners
Source: PubMed Central journal article supplement — BMJ Open. 2011 Aug 27;1(1):e000203. doi: 10.1136/bmjopen-2011-000203 (PMC3191582; doi:10.1136/bmjopen-2011-000203), 2011-08-27
Supplement: bmjopen-2011-000203.draft_revisions.pdf [file bmjopen-2011-000203.draft_revisions.pdf]

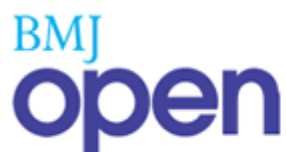

**Improvement in the quality of doctor-patient communication between 1982 and 2001: an observational study on hypertension care as perceived by patients and professionals**

|                                 |                                                                                                                                                                                                                                                                                                                                      |
|---------------------------------|--------------------------------------------------------------------------------------------------------------------------------------------------------------------------------------------------------------------------------------------------------------------------------------------------------------------------------------|
| Journal:                        | <i>BMJ Open</i>                                                                                                                                                                                                                                                                                                                      |
| Manuscript ID:                  | bmjopen-2011-000203                                                                                                                                                                                                                                                                                                                  |
| Article Type:                   | Research                                                                                                                                                                                                                                                                                                                             |
| Date Submitted by the Author:   | 07-Jun-2011                                                                                                                                                                                                                                                                                                                          |
| Complete List of Authors:       | Butalid, Ligaya; NIVEL, Netherlands Institute for Health Services Research<br>Verhaak, Peter; NIVEL, Netherlands Institute of Health Services Research<br>Tromp, Fred; Radboud University Nijmegen Medical Centre, Department of Primary and Community Care<br>Bensing, Jozien; NIVEL, Netherlands Institute for Health Services Res |
| <b>Primary Subject Heading</b>: | General practice & family medicine                                                                                                                                                                                                                                                                                                   |
| Keywords:                       | PRIMARY CARE, MEDICAL HISTORY, Quality in health care < HEALTH SERVICES ADMINISTRATION & MANAGEMENT                                                                                                                                                                                                                                  |
|                                 |                                                                                                                                                                                                                                                                                                                                      |

SCHOLARONE™  
Manuscripts

1  
2  
3 **Improvement in the quality of doctor-patient communication between 1982 and 2001: an**  
4 **observational study on hypertension care as perceived by patients and professionals**  
5  
6  
7

8  
9 Ligaya Butalid, Peter FM Verhaak, Fred Tromp, Jozien M Bensing  
10

11  
12 NIVEL, Netherlands Institute for Health Services Research, PO Box 1568, 3500 BN, Utrecht, The  
13  
14 Netherlands  
15

16 Ligaya Butalid, researcher / PhD student  
17

18 Peter FM Verhaak, professor  
19

20 Jozien M Bensing, professor  
21  
22

23  
24 Radboud University Nijmegen Medical Centre, Department of Primary and Community Care. PO Box  
25  
26 9101, 6500 HB, Nijmegen, The Netherlands  
27

28 Fred Tromp, researcher  
29  
30

31  
32 Correspondence to: Ligaya Butalid, [l.butalid@nivel.nl](mailto:l.butalid@nivel.nl)  
33  
34

35  
36  
37  
38 Running head:  
39

40 Improvement in quality of doctor-patient communication  
41  
42

43  
44 Number of tables: 2  
45

46 Number of figures: 1  
47  
48

49  
50 Word count:  
51

52 Main text: 2648 words  
53

54 Abstract: 279 words  
55  
56  
57  
58  
59  
60

1  
2  
3 Abstract  
4  
5  
6

7 *Background*  
8

9 The rise of evidence-based medicine may have implications for the doctor-patient interaction. In recent  
10 decades, a shift towards a more task-oriented approach in general practice indicates a possible effect  
11 of the implementation of clinical guidelines. In this study, we examined whether this shift is  
12 accompanied by changes in perceived quality of doctor-patient communication.  
13  
14

15  
16  
17 *Design*  
18

19 GP observers and patient observers performed quality assessments of Dutch General Practice  
20 consultations on hypertension videotaped in 1982-1984 and 2000-2001. In the first cohort (1982-1984)  
21 81 patients were recorded by 23 GPs and in the second cohort (2000-2001) 108 patients were  
22 recorded by 108 GPs. The GP observers and patient observers rated the consultations on a scale  
23 from 1 to 10 on three quality dimensions: medical technical quality, psychosocial quality and quality of  
24 interpersonal behaviour. With multilevel regression analyses, we tested whether a change occurred  
25 over time.  
26  
27  
28  
29  
30  
31

32  
33 *Results*  
34

35 The findings showed a significant improvement over time on all three dimensions. There was no  
36 difference between the quality assessments of GP observers and patient observers. The three  
37 different dimensions were moderately to highly correlated and the assessments of GP observers  
38 showed less variability in the second cohort.  
39  
40  
41

42  
43 *Conclusions*  
44

45 Medical technical quality, psychosocial quality and the quality of interpersonal behaviour in  
46 hypertension consultations have improved over time as perceived by general practitioners and  
47 patients. The implementation of clinical guidelines does not seem to detract from individual attention  
48 for the patient. In addition, professionals are shown to be successfully assisted by clinical guidelines,  
49 since less variability was found in their assessments of the more recent consultations. The next step in  
50 this line of research is to unravel the factors that determine patients' quality assessments of doctor-  
51 patient communication.  
52  
53  
54  
55  
56  
57  
58  
59  
60

## Improvement in quality of doctor-patient communication

*Article focus*

- Doctor-patient communication in hypertension consultations has become more business-like and task-oriented in the past few decades.
- Shifts in communication styles in general practice may have produced changes in quality assessments of doctor-patient communication by general practitioners and patients.

*Key messages*

- Quality of care in hypertension consultations as perceived by general practitioners and patients has improved between the early 1980s and twenty years later.
- The increased emphasis on task-oriented care does not necessarily detract from the attention to psychosocial aspects and the doctor-patient relationship.

*Strengths and limitations of this study*

- Videotaped real-life general practice consultations from two distinct periods were analysed. Thus, the findings refer to actual historical changes in general practice.
- Assessments of the GPs were executed by contemporary peers, while the assessments of patients were performed retrospectively. However, the concurrence of assessments of patient observers and GP observers in their different contexts reinforces our conclusions.

Box 1 Article summary

## Introduction

The profession of general practice is evolving and the rise of evidence-based medicine may have implications for doctor-patient interaction [1-6]. Studies have found that doctor-patient communication has become more task-oriented [7]. Non-verbal aspects such as eye contact and body posture have changed in the past few decades [8]. These changes may be related to the implementation of clinical guidelines in general practice, which were first introduced in the Netherlands in 1977 [9]. Today, there are ninety-six different clinical guidelines [10]. The main aim of these clinical guidelines are to standardize and improve the quality of care in general practice. Simultaneously, the curriculum of the professional training has undergone some major revisions focusing on training in communication skills [11,12]. However, there may be some tension between the development of standardized care and individual attention to patients [4,13,14]. In this study, we examined whether the shift towards more standardized and task-oriented care in general practice has produced changes in the quality of doctor-patient communication as assessed by general practitioners and patients.

Quality of doctor-patient communication is a multidimensional concept which includes both medical technical and psychosocial aspects but also involves facets of the interaction. We focused on hypertension in general practice, since this is a common health problem and different dimensions of quality are clearly identifiable when dealing with hypertension care. Hypertension care does not merely depend on the quality of medical technical aspects, but also on psychosocial components [15]. Hypertension is a risk factor for coronary heart disease, and is sensitive to stress and psychological disorders [16]. The quality of the doctor-patient interaction also determines patients' active participation and encourages self-management skills that are necessary when dealing with hypertension [17,18]. Moreover, fostering the doctor-patient relationship is considered an essential and universal value within medical practice [19-21].

General practitioners in the Netherlands were first confronted with the use of clinical guidelines in the 1970s and 1980s. Thirty years later, these clinical guidelines are widely implemented in professionals' daily practice and it is expected that they also serve as a yardstick for general practitioners to measure the quality of the doctor-patient interaction. In contrast, most patients are not fully aware of these developments in general practice. Their perspective is different to that of the professionals, and patients mainly base their quality assessments on experiential knowledge and can

Improvement in quality of doctor-patient communication

have different priorities and preferences compared to professionals [22-24]. However, if clinical guidelines have actually improved the quality of the medical interaction, patients should be able to perceive an improvement in doctor-patient communication over time.

## Methods

We compared quality assessments of GP observers and patient observers across two time periods. The first cohort consists of consultations videotaped in 1982-1984. The second cohort was videotaped in 2000-2001.

### *Videotaped consultations*

Based on the International Classification of Primary Care (ICPC), we selected videotaped consultations with hypertension patients (ICPC-codes K85-K87) from a larger dataset of two cohorts [25,26]. From the first cohort videotaped in 1982-1984 (n=1569) a total of 103 consultations on hypertension were selected. However, due to the deterioration in the technical quality of some videotaped consultations, only 81 consultations were useable for the quality assessments. Of the second dataset from 2000-2001 (n=2794), 108 videotaped consultations on hypertension were selected.

The patients in the selected consultations showed no differences in age and gender between the two study samples. The mean age was 58.5 (sd = 14.80) and 61.4 (sd = 14.66) years, respectively (*n.s.*) and 65% versus 63% of the sample was female (*n.s.*). In both samples the vast majority of the consultations were repeat visits. All physicians in the selected consultations were specialized in general practice and the majority (92% versus 94%) had more than 5 years experience. In the first study sample (1982-1984), all of the physicians (N = 23) were male and in the second study sample (2000-2001), 80 physicians were male and 28 were female (74% versus 26%). In the Netherlands, routine care for hypertension patients is delivered in general practice. The study was carried out in accordance with Dutch privacy legislation. All participating physicians and patients who were videotaped during their consultation gave their informed consent.

### *Peer assessment by general practitioners (GP observers)*

## Improvement in quality of doctor-patient communication

1  
2  
3 In 1987, twelve GP observers (age 30-70; 4 female and 8 male physicians) were asked to rate the  
4 selected consultations from the first cohort (videotaped in 1982-1984). These GP observers had a  
5 minimum of five years experience in practice. The procedure in this first cohort of peer assessments  
6 has been described previously [15]. In 2002, the second cohort of selected consultations (videotaped  
7 in 2000-2001) was individually rated by a new group of twelve GP observers (age 36-62; 6 female and  
8 6 male physicians). These GP observers also had a minimum of five years experience in practice.

9  
10  
11  
12  
13  
14  
15 In both cohorts, each consultation was observed and rated by all twelve GP observers on  
16 three dimensions of quality of care. A scale from 1 (very poor) to 10 (excellent) was used. The  
17 dimensions assessed by the general practitioners were 1) medical technical quality of care, 2)  
18 psychosocial quality of care, and 3) quality of interpersonal behaviour (doctor-patient relationship).  
19 The GP observers received a short training program about the rating scale and the different  
20 dimensions of quality of care. For the assessments of the medical technical dimension, they were  
21 instructed to take into account the clinical guideline for hypertension. The psychosocial dimension  
22 referred to the way non-somatic aspects related to the complaint were addressed; and interpersonal  
23 quality referred to the interaction between GP and patient. All GP observers signed a statement of  
24 confidentiality before starting the assessments.

25  
26  
27  
28  
29  
30  
31  
32  
33  
34  
35  
36  
37 *Patient assessment by patient observers with hypertension*

38 Patient observers with hypertension rated videotaped consultations of both cohorts individually in the  
39 period from April 2010 to July 2010. People were recruited through advertisements on health related  
40 internet web pages as well as via flyers placed in health care settings (general practices,  
41 pharmacists). Participants who had previously been involved in other health research projects  
42 conducted by NIVEL were actively approached by mail. All patient observers met the following criteria:  
43 diagnosed with hypertension by a physician, consulted the general practitioner at least once in the  
44 past year, not involved in a health care related lawsuit or legal complaint procedure, and being able to  
45 understand and speak the Dutch language.

46  
47  
48  
49  
50  
51  
52  
53  
54 In total, 108 patient observers with hypertension (age 24-80; 73 female and 35 male  
55 observers) completed the patient assessments of the videotaped consultations. See Table 1 for  
56 background characteristics of the patient observers. Each patient observer observed 8-12  
57 consultations (randomly assigned from both cohorts, but with a total duration of approximately 90  
58  
59  
60

Improvement in quality of doctor-patient communication

minutes) in order for each consultation in the sample to be rated 5 or 6 times. The patient observers individually rated the same three dimensions of quality of care as the GP observers and received a comparable short training program. For the medical technical dimension, patient observers were instructed to consider the clarity of any (medical) explanations given by the general practitioner, while taking into account their knowledge based on their own experience. For the other two dimensions, they received the same instruction as the GP observers. All patient observers signed a statement of confidentiality before starting the assessments.

[insert Table 1]

### *Statistical analyses*

To account for the multilevel structure of quality assessments nested within videotaped consultations and individual observers, multilevel regression analysis was applied. The categories cohort (0 = 1982-1984 and 1 = 2000-2001) and observer type (0 = patient observers and 1 = GP observers) were coded as dummy variables. First, the associations between the three dimensions of quality of care were examined. Second, it was tested whether a change over time in quality assessments occurred and whether the quality assessments of patient observers and GP observers were comparable.

### *Results*

#### *Associations between the three dimensions of quality of care*

The quality assessments correlated positively between the three different dimensions of quality of care for each observation period and for GPs and patients as well (see Table 2). Furthermore, analysis revealed that the overall quality assessments of interpersonal behaviour were higher compared to the medical technical dimension ( $T(5258) = 2.79, p < .01$ ); and the medical technical dimension received higher quality assessments than the psychosocial dimension ( $T(5249) = 6.80, p < .001$ ).

[insert Table 2]

#### *Changes in quality assessments over time*



## Improvement in quality of doctor-patient communication

1  
2  
3 The assessments of the second cohort (2000-2001) were higher compared to the first cohort (1982-  
4 1984) for the three dimensions (see Figure 1). The multilevel regression analyses showed significant  
5 effects of cohort in all three dimensions: medical technical quality ( $B = 0.58, Z = 5.43, p < .001$ ),  
6 psychosocial quality ( $B = 0.35, Z = 2.36, p < .05$ ), and quality of interpersonal behaviour ( $B = 0.50, Z =$   
7 3.64,  $p < .001$ ).  
8  
9  
10  
11  
12

13  
14  
15 [insert Figure 1]  
16  
17

### 18 *Comparing patient observers' and GP observers' assessments*

19 The figure shows that the assessments of GP observers were somewhat lower than assessments of  
20 patient observers; however, in none of the three dimensions was this difference found to be  
21 significant: medical technical quality ( $B = -0.36, Z = 1.89, n.s.$ ), psychosocial quality ( $B = -0.19, Z =$   
22 0.93,  $n.s.$ ), and quality of interpersonal behaviour ( $B = -0.24, Z = 1.55, n.s.$ ).  
23  
24  
25  
26  
27  
28  
29

30 When examining the variance of the quality assessments, the standard deviations of the assessments  
31 by patient observers and GP observers in the second cohort were smaller than the first cohort on all  
32 three dimensions (for patient observers; medical technical quality:  $F(478, 528) = 1.18, p < .05$ ,  
33 psychosocial quality:  $F(480, 528) = 1.20, p < .05$ , quality of interpersonal behaviour:  $F(479, 537) =$   
34 1.30,  $p < .01$  and for GP observers; medical technical quality:  $F(327, 1288) = 2.03, p < .001$ ,  
35 psychosocial quality:  $F(326, 1288) = 2.71, p < .001$ , quality of interpersonal behaviour:  $F(327, 1288) =$   
36 2.26,  $p < .001$ ). Furthermore, all standard deviations in the assessments of GP observers were smaller  
37 compared to the patient observers in the first cohort (medical technical quality:  $F(478, 327) = 1.83, p <$   
38  $.001$ , psychosocial quality:  $F(480, 326) = 1.59, p < .001$ , quality of interpersonal behaviour:  $F(479,$   
39  $327) = 1.64, p < .001$ ) and second cohort (medical technical quality:  $F(528, 1288) = 3.14, p < .001$ ,  
40 psychosocial quality:  $F(528, 1288) = 3.58, p < .001$ , quality of interpersonal behaviour:  $F(537, 1288) =$   
41 2.85,  $p < .001$ ).  
42  
43  
44  
45  
46  
47  
48  
49  
50  
51  
52  
53

54 In the model with the assessment of medical technical quality, the intraclass correlation on  
55 video level was 14% and on observer level 32%. For psychosocial quality, video level contained 26%  
56 and observer level 27% of the variance; for quality of interpersonal behaviour we calculated a variance  
57 of 27% on video level and 18% on observer level.  
58  
59  
60

1 Improvement in quality of doctor-patient communication  
2  
3  
4

5 Discussion  
6  
7  
8

9 Medical technical quality, psychosocial quality and the quality of interpersonal behaviour of  
10 hypertension consultations in general practice in the Netherlands have improved between the 1980s  
11 and 2000-2001 as perceived by general practitioners and patients. Although the improvement of  
12 medical technical quality is in line with our expectations, the improvement of the other two dimensions  
13 is remarkable because it contradicts the possible tension between evidence-based medicine and  
14 individual attention to the patient [4,13,14]. However, there have been major revisions in the  
15 curriculum of the professional training for general practitioners, that could account for the improvement  
16 on all three dimensions [11,12]. The three dimensions of quality were moderately to highly correlated,  
17 so there was internal consistency in the quality assessments within consultations. The assessments of  
18 interpersonal quality were higher than the assessments on the other two dimensions, which supports  
19 the central role of the doctor-patient relationship in the medical interaction between general  
20 practitioners and their patients. GP and patient observers agreed on the improved quality of the  
21 consultations, but GP observers showed less variation in their assessments than patient observers.  
22 There was also less variation in the assessments of the second cohort compared to the first cohort,  
23 which implies that there is greater consensus on the quality of the more recent consultations.  
24  
25  
26  
27  
28  
29  
30  
31  
32  
33  
34  
35  
36  
37  
38  
39  
40

#### 41 *Implementation of clinical guidelines in general practice*

42 Our findings indicate that standardized clinical guidelines do not necessarily jeopardize with the  
43 individual attention for the patient, since not only medical technical quality, but also psychosocial  
44 quality and the quality of interpersonal behaviour improved over time. This contradicts previous  
45 findings that patients and doctors shared less concerns and less process-oriented talk (partnership  
46 building and directions) in more recent consultations [7]. Apparently, these shifts in communication  
47 styles do not necessarily lead to a decline in perceived quality. This seemingly contradictory result  
48 needs further examination, for example in qualitative focus groups. In addition, the reduced variability  
49 in the quality assessments of general practitioners can be considered as a sign that professionals are  
50 successfully assisted by clinical guidelines to assess and safeguard the quality of care. There seem to  
51  
52  
53  
54  
55  
56  
57  
58  
59  
60

## Improvement in quality of doctor-patient communication

1  
2  
3 be better consensus between general practitioners on what can be considered a 'good' consultation in  
4  
5 respect of the more recent consultations.  
6  
7

*Tailored approach to doctor-patient communication*

8  
9  
10 There was relatively high variance on observer level, indicating large individual differences between  
11  
12 observers; and the variability of the assessments of patient observers was larger than GP observers.  
13  
14 However, this is understandable since patient observers in particular base their ratings on experiential  
15  
16 knowledge that can differ greatly between patients. Therefore, the high variability between patients  
17  
18 calls for a patient-centred and individually tailored approach to doctor-patient communication in  
19  
20 general practice.  
21  
22

*Strengths and limitations of the study*

23  
24  
25 A strong point of the current study is that we examined medical interactions using videotaped real-life  
26  
27 general practice consultations with hypertension patients from two distinct time periods. Thus, the  
28  
29 findings refer to actual historical changes in the perceived quality of doctor-patient communication in  
30  
31 general practice. In addition, the videotaped participants were not aware of the fact that the analyses  
32  
33 would focus on hypertension consultations. Video recording is a valid method to examine doctor-  
34  
35 patient communication: the influence of the video recorder on participants' behaviour is marginal [27].  
36  
37 Moreover, the inclusion of both the professionals' and the patients' perspective enables a  
38  
39 comprehensive view on quality of care. The observers were either experienced GPs or experienced  
40  
41 patients (hypertension patients who visit their general practitioner regularly), so they were well able to  
42  
43 relate to the videotaped consultations. In addition, we matched the medical condition of the patient  
44  
45 observers with the patients in the videotaped consultations. Previous studies show that lay people  
46  
47 (experienced patients) are well able to rate videotaped doctor-patient interactions and have an added  
48  
49 value over ratings given exclusively by professionals or researchers [28-30].  
50  
51

52  
53 A possible weakness of the study is that the assessments of the professionals were executed  
54  
55 by contemporary peers, while the assessments of patients were performed retrospectively. The GP  
56  
57 observers judged the video-taped consultations in the same time period in which the consultations  
58  
59 took place. Therefore, the context in which the GP observers rated the consultations changed  
60  
between the two cohorts. This enabled examination of the effects of context related changes such as

Improvement in quality of doctor-patient communication

1  
2  
3  
4 the implementation of clinical guidelines on the quality assessments. In contrast, the patient observers  
5  
6 judged video-taped consultations that took place approximately 10 or 30 years ago. The context in  
7  
8 which their ratings were conducted did not change between the two cohorts, but was also influenced  
9  
10 by current knowledge and experience. Since it can be argued that expectations of what is considered  
11  
12 a 'good' consultation are also subject to change over time, we cannot automatically assume that  
13  
14 quality assessments would have been identical if patient observers also rated the consultations in the  
15  
16 same time period as the recording of the consultations. However, the concurrence of assessments of  
17  
18 patient observers and GP observers in their different contexts reinforces our conclusions.

19  
20  
21 This study shows that although there is an increased emphasis on task-oriented care in general  
22  
23 practice, the perceived quality of doctor-patient communication has improved on different dimensions  
24  
25 including psychosocial aspects and the doctor-patient relationship. General practitioners were  
26  
27 supported by clinical guidelines that could explain the improvement over time, but patients likewise  
28  
29 recognized an improvement. The next step in this line of research is to unravel the factors that  
30  
31 determine patients' quality assessments of doctor-patient communication.

### 32 33 34 35 *Acknowledgements*

36  
37 We thank the GP observers and patient observers who made the assessments. We are grateful to the  
38  
39 general practitioners and the patients who participated in the study. We also thank Peter  
40  
41 Spreeuwenberg for the statistical advice.

42  
43 Funding: This work was supported by the Dutch Ministry of Education, Culture and Science.  
44  
45 The previous studies in which the recording of the consultations were performed were financed by the  
46  
47 Dutch Ministry of Health, Welfare and Sport, the Netherlands Organisation for Health Research and  
48  
49 Development (ZonMw) and the research fund of the Innovation Fund of Health Insurers (RVVZ).

50  
51 Competing interest: The authors declare that they have no competing interests.

52  
53 Ethical approval: The studies were carried out according to Dutch privacy legislation. The  
54  
55 privacy regulation was approved by the Dutch Data Protection Authority. According to Dutch  
56  
57 legislation, approval by a medical ethics committee was not required for these observational studies.

58  
59 Contribution: LB coordinated the patient observers' assessments, formulated the study  
60  
questions, discussed core ideas, analysed the data, and wrote the paper. PV designed the original

## Improvement in quality of doctor-patient communication

1  
2  
3 study, discussed core ideas, and edited the paper. FT coordinated the second cohort GP observers'  
4  
5 assessments, and commented on the paper. JB coordinated the first cohort GP observers'  
6  
7 assessments, designed the original study, discussed core ideas, and edited the paper.  
8

9 Data sharing statement: Consent for data sharing was not obtained from study participants,  
10  
11 but the presented data are anonymised and there is no risk of identification. Access to the dataset is  
12  
13 available from the corresponding author (l.butalid@nivel.nl) in STATA format for academic  
14  
15 researchers interested in undertaking a formally agreed collaborative research project.  
16  
17  
18  
19  
20  
21  
22  
23  
24  
25  
26  
27  
28  
29  
30  
31  
32  
33  
34  
35  
36  
37  
38  
39  
40  
41  
42  
43  
44  
45  
46  
47  
48  
49  
50  
51  
52  
53  
54  
55  
56  
57  
58  
59  
60

For peer review only

Improvement in quality of doctor-patient communication

References

- [1] Lain C, Davidoff F. Patient-centered medicine. A professional evolution. *JAMA*, 1996;275:152-6.
- [2] McWhinney IR. Primary care: core values. Core values in a changing world. *BMJ*, 1998;316:1807-9.
- [3] Smith R. All changed, changed utterly. British medicine will be transformed by the Bristol case. *BMJ*, 1998;316:1917-8.
- [4] Bensing J. Bridging the gap. The separate worlds of evidence-based medicine and patient-centered medicine. *Patient Educ Couns*, 2000;39:17-25.
- [5] Van den Brink-Muinen A, Van Dulmen SM, De Haes HCJM, Visser A, Schellevis FG, Bensing JM. Has patients' involvement in the decision-making process changed over time? *Health Expect*, 2006;9:333-342.
- [6] Bensing JM, Verhaak PFM. Communication in medical encounters. In: Kaptein A, Weinman J. (ed). *Health Psychology*. Oxford: Blackwell Publishing Ltd, 2004
- [7] Bensing JM, Tromp F, Van Dulmen S, Van den Brink-Muinen A, Verheul W, Schellevis FG. Shifts in doctor-patient communication between 1986 and 2002: a study of videotaped General Practice consultations with hypertension patients. *BMC Fam Pract*, 2006;7:62-8.
- [8] Noordman J, Verhaak P, Van Beljouw I, Van Dulmen S. Consulting room computers and their effect on GP-patient communication: comparing two periods of computer use. *Fam Pract*, 2010;27:644-51.
- [9] Nederlands Huisartsen Genootschap [Dutch College of General Practitioners]. *Huisarts & praktijk: hypertensie. Huisarts en wetenschap [General Practitioner & Practice: Hypertension. General Practitioner and Science]*, June 1977.
- [10] NHG-Standaarden [Clinical Guidelines of the Dutch College of General Practitioners]; [internet]. Utrecht (the Netherlands): Nederlands Huisartsen Genootschap [Dutch College of General Practitioners]; [cited 2011 Apr 4]. Available from: [http://nhg.artsennet.nl/kenniscentrum/k\\_richtlijnen/k\\_nhgstandaarden.htm](http://nhg.artsennet.nl/kenniscentrum/k_richtlijnen/k_nhgstandaarden.htm)

## Improvement in quality of doctor-patient communication

- 1  
2  
3 [11] Grol R, Polleman M, Verheij T. De meerjarige beroepsopleiding tot huisarts. II: 'Structuurplan'  
4 en onderwijsdoelen [The multi-year training for GPs. II: 'Structure' and goals], *Medisch*  
5 *Contact*, 1986;41:539-44.  
6  
7  
8  
9 [12] Kramer AWM, Düsman H, Tan LHC, Jansen KJM, Grol RPTM and van der Vleuten CPM.  
10 Effect of extension of postgraduate training in general practice on the acquisition of knowledge  
11 of trainees. *Fam Pract*, 2003;20:207-12.  
12  
13  
14  
15 [13] Barrat A. Evidence based medicine and shared decision making: The challenge of getting both  
16 evidence and preferences in to health care. *Patient Educ Couns*, 2008;73:407-12.  
17  
18  
19 [14] Krahn M., Naglie G. The next step in guideline development. Incorporating patient  
20 preferences. *JAMA*, 2008;300:436-8.  
21  
22  
23 [15] Bensing JM. *Doctor-patient communication and the quality of care: an observation study into*  
24 *affective and instrumental behaviour in general practice*. Utrecht: NIVEL, 1991 [dissertation]  
25  
26  
27 [16] Bunker SJ, Colquhoun DM, Esler MD, Hickie IB, Hunt D, Jelinek VM, Oldenburg BF, Peach  
28 HG, Ruth D, Tennant CC, Tonkin AM. 'Stress' and coronary heart disease: psychosocial risk  
29 factors. *Med J Aust*, 2003;178:272-6.  
30  
31  
32 [17] Hill MN, Miller NH, De Geest S, American Society of Hypertension Writing Group. Adherence  
33 and persistence with taking medication to control high blood pressure. *J Am Soc Hypertens*,  
34 2011;5:56-63.  
35  
36  
37  
38 [18] Cooper LA, Roter DL, Bone LR, Larson SM, Miller ER, Barr MS, Carson KA, Levine DM. A  
39 randomized controlled trial of intervention to enhance patient-physician partnership, patient  
40 adherence and high blood pressure control among ethnic minorities and poor persons: a study  
41 protocol NCT00123045. *Implement Sci*, 2009;4:7-22.  
42  
43  
44  
45 [19] White KL. *The task of medicine: dialogue at Wickenburg*. Menlo Park: The Henry J. Kaiser  
46 Family Foundation, 1998.  
47  
48  
49  
50 [20] Stewart M, Roter D. (ed). *Communicating with medical patients*. Newbury Park: Sage  
51 Publications, 1989  
52  
53  
54 [21] Epstein RM, Street RL. *Patient-centered communication in cancer care: promoting healing*  
55 *and reducing suffering*. Bethesda: National Cancer Institute NIH, 2007  
56  
57  
58 [22] Caron-Flinterman JF, Broerse JEW, Bunders JFG. The experiential knowledge of patients: a  
59 new resource for biomedical research? *Soc Sci Med*, 2005;60:2575-84.  
60

## Improvement in quality of doctor-patient communication

- 1  
2  
3  
4 [23] Britten N. Patients' ideas about medicines: a qualitative study in a general practice population.  
5 *Br J Gen Pract*, 1994;44:465-8.  
6  
7 [24] Brody DS, Khaliq AM, Thompson TL. Patients' perspectives on the management of emotional  
8 distress in primary care settings. *J Gen Intern Med*, 1997;12:403-6.  
9  
10 [25] Verhaak PFM. Detection of psychologic complaints by general practitioners. *Med Care*,  
11 1988;26:1009-20.  
12  
13 [26] Van den Brink-Muinen A, Van Dulmen AM, Schellevis FG, Bensing JM. *Tweede Nationale*  
14 *Studie naar ziekten en verrichtingen in de huisartspraktijk: oog voor communicatie: huisarts-*  
15 *patiënt communicatie in Nederland*. [The second National Study of diseases and actions in  
16 general practice: an eye for communication: doctor-patient communication in the Netherlands]  
17 Utrecht: NIVEL, 2004  
18  
19 [27] Arborelius E, Timpka T. In what way may videotapes be used to get significant information  
20 about the patient-physician relationship? *Med Teach*, 1990;12:197-208.  
21  
22 [28] Mazor KM, Ockene JK, Rogers HJ, Carlin MM, Quirk ME. The relationship between checklist  
23 scores on a communication OSCE and analogue patients' perceptions of communication. *Adv*  
24 *Health Sci Educ Theory Pract*, 2005;10:37-51.  
25  
26 [29] Swenson SL, Zettler P, Lo B. 'She gave it her best shot right away': Patient experiences of  
27 biomedical and patient-centered communication. *Patient Educ Couns*, 2006;61:200-11.  
28  
29 [30] Moretti F, Van Vliet L, Bensing J, Deledda G, Mazzi M, Rimondini M, Zimmerman C, Fletcher  
30 I. A standardized approach to qualitative content analysis of focus group discussions from  
31 different countries. *Patient Educ Couns*, 2011;82:420-8.  
32  
33  
34  
35  
36  
37  
38  
39  
40  
41  
42  
43  
44  
45  
46  
47  
48  
49  
50  
51  
52  
53  
54  
55  
56  
57  
58  
59  
60



## Improvement in quality of doctor-patient communication

Table 1 Background characteristics of the patient observers

| Background characteristics                   | Patient observers with hypertension (N = 108) |
|----------------------------------------------|-----------------------------------------------|
| Gender                                       |                                               |
| Female                                       | 73 (68%)                                      |
| Male                                         | 35 (32%)                                      |
| Age                                          |                                               |
| < 40                                         | 2 (2%)                                        |
| 40 – 49                                      | 12 (11%)                                      |
| 50 – 59                                      | 46 (43%)                                      |
| 60 – 69                                      | 39 (36%)                                      |
| 70 – 79                                      | 9 (8%)                                        |
| Education level                              |                                               |
| Primary education                            | 2 (2%)                                        |
| Secondary education                          | 59 (66%)                                      |
| Third-level education                        | 47 (31%)                                      |
| Employment                                   |                                               |
| Retired                                      | 35 (32%)                                      |
| Employed                                     | 31 (29%)                                      |
| Self-employed                                | 5 (5%)                                        |
| Other (student, housewife, job seeker)       | 37 (34%)                                      |
| Native background                            |                                               |
| Dutch                                        | 96 (89%)                                      |
| First generation migrant                     | 6 (5.5%)                                      |
| Second generation migrant                    | 6 (5.5%)                                      |
| Health                                       |                                               |
| Using medication for hypertension            | 81 (75%)                                      |
| Co morbidity other chronic disease           | 50 (46%)                                      |
| Health care use                              |                                               |
| Contact with GP in last two months           | 76 (70%)                                      |
| Contact with medical specialist in past year | 72 (67%)                                      |

Table 2 Associations (*Pearson's r*) between the three dimensions of quality of care

|                                        |                                   |                   | Medical technical | Psychosocial | Interpersonal |
|----------------------------------------|-----------------------------------|-------------------|-------------------|--------------|---------------|
| Cohort<br>1982-1984                    | All quality<br>assessments        | Medical technical | -                 |              |               |
|                                        |                                   | Psychosocial      | .66               | -            |               |
|                                        |                                   | Interpersonal     | .63               | .80          | -             |
|                                        | Assessments<br>of GP<br>observers | Medical technical | -                 |              |               |
|                                        |                                   | Psychosocial      | .54               | -            |               |
|                                        |                                   | Interpersonal     | .51               | .79          | -             |
| Assessments<br>of patient<br>observers | Medical technical                 | -                 |                   |              |               |
|                                        | Psychosocial                      | .70               | -                 |              |               |
|                                        | Interpersonal                     | .68               | .77               | -            |               |
| Cohort<br>2000-2001                    | All quality<br>assessments        | Medical technical | -                 |              |               |
|                                        |                                   | Psychosocial      | .58               | -            |               |
|                                        |                                   | Interpersonal     | .64               | .76          | -             |
|                                        | Assessments<br>of GP<br>observers | Medical technical | -                 |              |               |
|                                        |                                   | Psychosocial      | .55               | -            |               |
|                                        |                                   | Interpersonal     | .56               | .77          | -             |
| Assessments<br>of patient<br>observers | Medical technical                 | -                 |                   |              |               |
|                                        | Psychosocial                      | .62               | -                 |              |               |
|                                        | Interpersonal                     | .71               | .76               | -            |               |

1  
2  
3  
4  
5  
6  
7  
8  
9  
10  
11  
12  
13  
14  
15  
16  
17  
18  
19  
20  
21  
22  
23  
24  
25  
26  
27  
28  
29  
30  
31  
32  
33  
34  
35  
36  
37  
38  
39  
40  
41  
42  
43  
44  
45  
46  
47  
48  
49  
50  
51  
52  
53  
54  
55  
56  
57  
58  
59  
60

[see Powerpoint document]

Figure 1 Means (and 95% CI) of assessments of medical technical quality, psychosocial quality and quality of interpersonal behaviour

For peer review only

STROBE 2007 (v4) checklist of items to be included in reports of *cross-sectional studies*

| Section/Topic             | Item # | Recommendation                                                                                                                                                                                    | Reported on page # |
|---------------------------|--------|---------------------------------------------------------------------------------------------------------------------------------------------------------------------------------------------------|--------------------|
| Title and abstract        | 1      | (a) Indicate the study's design with a commonly used term in the title or the abstract                                                                                                            | 1,2                |
|                           |        | (b) Provide in the abstract an informative and balanced summary of what was done and what was found                                                                                               | 2                  |
| <b>Introduction</b>       |        |                                                                                                                                                                                                   |                    |
| Background/rationale      | 2      | Explain the scientific background and rationale for the investigation being reported                                                                                                              | 4,5                |
| Objectives                | 3      | State specific objectives, including any pre-specified hypotheses                                                                                                                                 | 4,5                |
| <b>Methods</b>            |        |                                                                                                                                                                                                   |                    |
| Study design              | 4      | Present key elements of study design early in the paper                                                                                                                                           | 5                  |
| Setting                   | 5      | Describe the setting, locations, and relevant dates, including periods of recruitment, exposure, follow-up, and data collection                                                                   | 5-7                |
| Participants              | 6      | Give the eligibility criteria, and the sources and methods of selection of participants                                                                                                           | 5,6                |
| Variables                 | 7      | Clearly define all outcomes, exposures, predictors, potential confounders, and effect modifiers. Give diagnostic criteria, if applicable                                                          | 6,7                |
| Data sources/ measurement | 8*     | For each variable of interest, give sources of data and details of methods of assessment (measurement). Describe comparability of assessment methods if there is more than one group              | 5-7                |
| Bias                      | 9      | Describe any efforts to address potential sources of bias                                                                                                                                         | 5-7                |
| Study size                | 10     | Explain how the study size was arrived at                                                                                                                                                         | 5                  |
| Quantitative variables    | 11     | Explain how quantitative variables were handled in the analyses. If applicable, describe which groupings were chosen and why                                                                      | 7                  |
| Statistical methods       | 12     | (a) Describe all statistical methods, including those used to control for confounding                                                                                                             | 7                  |
|                           |        | (b) Describe any methods used to examine subgroups and interactions                                                                                                                               | 7                  |
|                           |        | (c) Explain how missing data were addressed                                                                                                                                                       | 7                  |
|                           |        | (d) If applicable, describe analytical methods taking account of sampling strategy                                                                                                                | n/a                |
|                           |        | (e) Describe any sensitivity analyses                                                                                                                                                             | 7                  |
| <b>Results</b>            |        |                                                                                                                                                                                                   |                    |
| Participants              | 13*    | (a) Report numbers of individuals at each stage of study—eg numbers potentially eligible, examined for eligibility, confirmed eligible, included in the study, completing follow-up, and analysed | 7                  |
|                           |        | (b) Give reasons for non-participation at each stage                                                                                                                                              | n/a                |

|                          |     |                                                                                                                                                                                                              |              |
|--------------------------|-----|--------------------------------------------------------------------------------------------------------------------------------------------------------------------------------------------------------------|--------------|
|                          |     | (c) Consider use of a flow diagram                                                                                                                                                                           | n/a          |
| Descriptive data         | 14* | (a) Give characteristics of study participants (eg demographic, clinical, social) and information on exposures and potential confounders                                                                     | 5,6, Table 1 |
|                          |     | (b) Indicate number of participants with missing data for each variable of interest                                                                                                                          | n/a          |
| Outcome data             | 15* | Report numbers of outcome events or summary measures                                                                                                                                                         | 7,8          |
| Main results             | 16  | (a) Give unadjusted estimates and, if applicable, confounder-adjusted estimates and their precision (eg, 95% confidence interval). Make clear which confounders were adjusted for and why they were included | 8, Figure 1  |
|                          |     | (b) Report category boundaries when continuous variables were categorized                                                                                                                                    | 8, Figure 1  |
|                          |     | (c) If relevant, consider translating estimates of relative risk into absolute risk for a meaningful time period                                                                                             | n/a          |
| Other analyses           | 17  | Report other analyses done—eg analyses of subgroups and interactions, and sensitivity analyses                                                                                                               | 7,8, Table 2 |
| <b>Discussion</b>        |     |                                                                                                                                                                                                              |              |
| Key results              | 18  | Summarise key results with reference to study objectives                                                                                                                                                     | 9            |
| Limitations              | 19  | Discuss limitations of the study, taking into account sources of potential bias or imprecision. Discuss both direction and magnitude of any potential bias                                                   | 10,11        |
| Interpretation           | 20  | Give a cautious overall interpretation of results considering objectives, limitations, multiplicity of analyses, results from similar studies, and other relevant evidence                                   | 10,11        |
| Generalisability         | 21  | Discuss the generalisability (external validity) of the study results                                                                                                                                        | 10,11        |
| <b>Other information</b> |     |                                                                                                                                                                                                              |              |
| Funding                  | 22  | Give the source of funding and the role of the funders for the present study and, if applicable, for the original study on which the present article is based                                                | 11           |

\*Give information separately for cases and controls in case-control studies and, if applicable, for exposed and unexposed groups in cohort and cross-sectional studies.

**Note:** An Explanation and Elaboration article discusses each checklist item and gives methodological background and published examples of transparent reporting. The STROBE checklist is best used in conjunction with this article (freely available on the Web sites of PLoS Medicine at <http://www.plosmedicine.org/>, Annals of Internal Medicine at <http://www.annals.org/>, and Epidemiology at <http://www.epidem.com/>). Information on the STROBE Initiative is available at [www.strobe-statement.org](http://www.strobe-statement.org).

## Quality assessments of doctor-patient communication

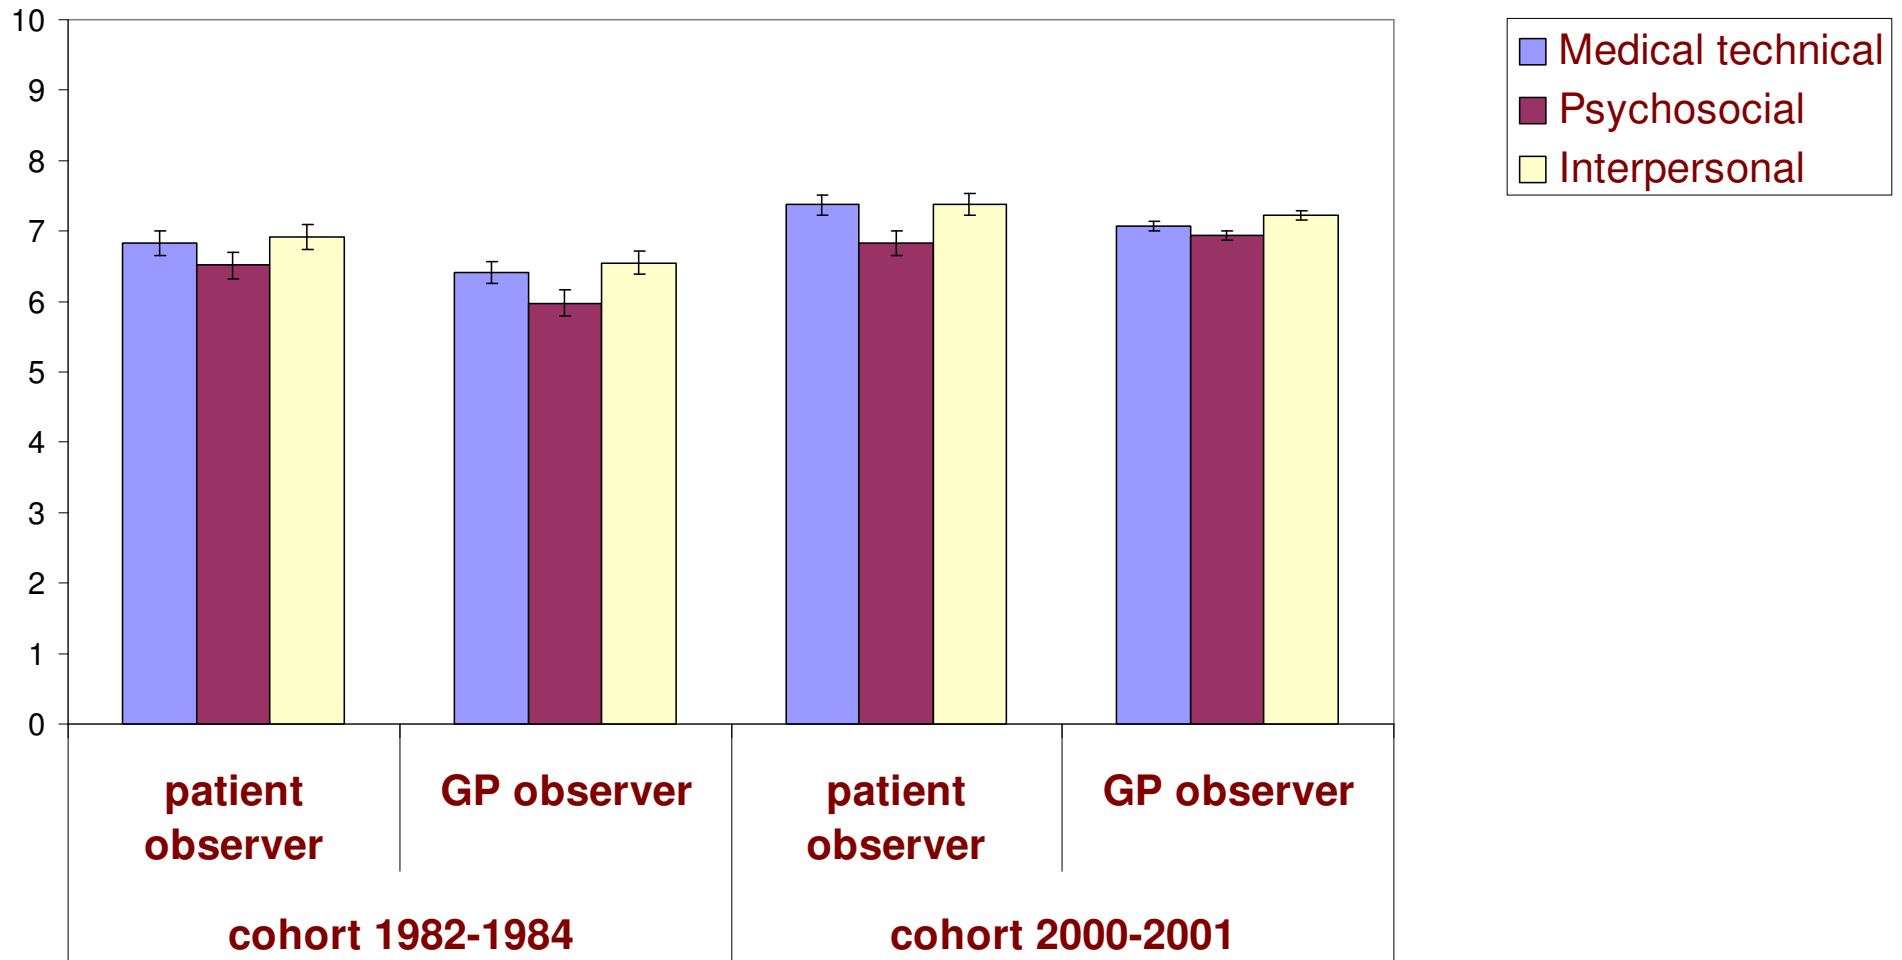



**Changes in the quality of doctor-patient communication  
between 1982 and 2001: an observational study on  
hypertension care as perceived by patients and general  
practitioners**

|                                 |                                                                                                                                                                                                                                                                                                                                      |
|---------------------------------|--------------------------------------------------------------------------------------------------------------------------------------------------------------------------------------------------------------------------------------------------------------------------------------------------------------------------------------|
| Journal:                        | <i>BMJ Open</i>                                                                                                                                                                                                                                                                                                                      |
| Manuscript ID:                  | bmjopen-2011-000203.R1                                                                                                                                                                                                                                                                                                               |
| Article Type:                   | Research                                                                                                                                                                                                                                                                                                                             |
| Date Submitted by the Author:   | 30-Jun-2011                                                                                                                                                                                                                                                                                                                          |
| Complete List of Authors:       | Butalid, Ligaya; NIVEL, Netherlands Institute for Health Services Research<br>Verhaak, Peter; NIVEL, Netherlands Institute of Health Services Research<br>Tromp, Fred; Radboud University Nijmegen Medical Centre, Department of Primary and Community Care<br>Bensing, Jozien; NIVEL, Netherlands Institute for Health Services Res |
| <b>Primary Subject Heading</b>: | General practice & family medicine                                                                                                                                                                                                                                                                                                   |
| Keywords:                       | PRIMARY CARE, MEDICAL HISTORY, Quality in health care < HEALTH SERVICES ADMINISTRATION & MANAGEMENT                                                                                                                                                                                                                                  |
|                                 |                                                                                                                                                                                                                                                                                                                                      |

SCHOLARONE™  
Manuscripts

1  
2  
3 **Changes in the quality of doctor-patient communication between 1982 and 2001: an**  
4 **observational study on hypertension care as perceived by patients and general practitioners**  
5  
6  
7

8  
9 Ligaya Butalid, Peter FM Verhaak, Fred Tromp, Jozien M Bensing  
10

11  
12 NIVEL, Netherlands Institute for Health Services Research, PO Box 1568, 3500 BN, Utrecht, The  
13  
14 Netherlands  
15

16 Ligaya Butalid, researcher / PhD student  
17

18 Peter FM Verhaak, professor  
19

20 Jozien M Bensing, professor  
21  
22

23  
24 Radboud University Nijmegen Medical Centre, Department of Primary and Community Care. PO Box  
25  
26 9101, 6500 HB, Nijmegen, The Netherlands  
27

28 Fred Tromp, researcher  
29  
30

31  
32 Correspondence to: Ligaya Butalid, l.butalid@nivel.nl  
33  
34

35  
36  
37  
38 Running head:  
39

40 Changes in quality of doctor-patient communication  
41  
42

43  
44 Number of tables: 2  
45

46 Number of figures: 1  
47

48 Number of references: 38  
49  
50

51  
52 Word count:  
53

54 Main text: **3101** words  
55

56 Abstract: 286 words  
57  
58  
59  
60

1  
2  
3 Abstract  
4  
5  
6

7 *Background*  
8

9 The rise of evidence-based medicine may have implications for the doctor-patient interaction. In recent  
10 decades, a shift towards a more task-oriented approach in general practice indicates a development  
11 towards a more standardized health care. In this study, we examined whether this shift is  
12 accompanied by changes in perceived quality of doctor-patient communication.  
13  
14

15  
16  
17 *Design*  
18

19 GP observers and patient observers performed quality assessments of Dutch General Practice  
20 consultations on hypertension videotaped in 1982-1984 and 2000-2001. In the first cohort (1982-1984)  
21 81 patients were recorded by 23 GPs and in the second cohort (2000-2001) 108 patients were  
22 recorded by 108 GPs. The GP observers and patient observers rated the consultations on a scale  
23 from 1 to 10 on three quality dimensions: medical technical quality, psychosocial quality and quality of  
24 interpersonal behaviour. With multilevel regression analyses, we tested whether a change occurred  
25 over time.  
26  
27  
28  
29  
30  
31

32  
33 *Results*  
34

35 The findings showed a significant improvement over time on all three dimensions. There was no  
36 difference between the quality assessments of GP observers and patient observers. The three  
37 different dimensions were moderately to highly correlated and the assessments of GP observers  
38 showed less variability in the second cohort.  
39  
40  
41

42  
43 *Conclusions*  
44

45 Hypertension consultations in general practice in the Netherlands received higher quality assessments  
46 by general practitioners and patients on medical technical quality, psychosocial quality and the quality  
47 of interpersonal behaviour in 2000-2001 as compared to the 1980s. The shift towards a more task-  
48 oriented approach in hypertension consultations does not seem to detract from individual attention for  
49 the patient. In addition, there is less variation between general practitioners in the quality assessments  
50 of more recent consultations. The next step in this line of research is to unravel the factors that  
51 determine patients' quality assessments of doctor-patient communication.  
52  
53  
54  
55  
56  
57  
58  
59  
60



## Changes in quality of doctor-patient communication

*Article focus*

- Doctor-patient communication in hypertension consultations has become more business-like and task-oriented in the past few decades.
- Shifts in communication styles in general practice may have produced changes in quality assessments of doctor-patient communication by general practitioners and patients.

*Key messages*

- Compared to twenty years earlier (1982-1984), hypertension consultations recorded in 2000-2001 received higher quality assessments by GP observers as well as patient observers on three distinct quality dimensions: medical technical quality, psychosocial quality and the quality of interpersonal behaviour.
- There was less variation between general practitioners in the quality assessments of more recent consultations.

*Strengths and limitations of this study**Strengths:*

- Videotaped real-life general practice consultations from two distinct periods were analysed, which means that the findings refer to actual behaviour in general practice.
- The quality assessments were made according to the same protocol in both periods.

*Limitations:*

- Assessments of the GPs were executed by contemporary peers, while the assessments of patients were performed retrospectively. However, the concurrence of assessments of patient observers and GP observers in their different contexts reinforces our conclusions.
- The generalizability of the findings is restricted to hypertension consultations, which involve a high proportion of repeat visits.

Box 1 Article summary

## Introduction

The profession of general practice is evolving and the rise of evidence-based medicine may have implications for doctor-patient interaction [1-6]. Studies have found that doctor-patient communication has become more task-oriented [7]. Non-verbal aspects such as eye contact and body posture have changed in the past few decades [8]. It has been suggested that these changes may be related to a development towards a more standardized health care, based on protocols and guidelines [7,9,10]. Simultaneously, the curriculum of the professional training has undergone some major revisions focusing on training in communication skills [11,12]. However, there may be some tension between the development of standardized care and individual attention to patients [4,13,14]. In this study, we examined whether the shift towards more standardized and task-oriented care in general practice has produced changes in the quality of doctor-patient communication as assessed by general practitioners and patients.

Quality of doctor-patient communication is a multidimensional concept which includes both medical technical and psychosocial aspects but also involves facets of the interaction. We focused on hypertension in general practice, since this is a common health problem and these three dimensions of quality are clearly identifiable when dealing with hypertension care. Hypertension care does not merely depend on the quality of medical technical aspects, but also on psychosocial components [15]. Hypertension is a risk factor for coronary heart disease, and is sensitive to stress and psychological disorders [16]. The quality of the doctor-patient interaction also determines patients' active participation and encourages self-management skills that are necessary when dealing with hypertension [17,18]. Moreover, fostering the doctor-patient relationship is considered an essential and universal value within medical practice [19-21].

Since clinical guidelines are widely implemented in professionals' daily practice, it is expected that they may serve as a yardstick for general practitioners to measure the quality of the doctor-patient interaction. In contrast, most patients are not fully aware of these developments in general practice. Their perspective is different to that of the professionals, and patients mainly base their quality assessments on experiential knowledge and can have different priorities and preferences compared to professionals [22-24]. However, if the quality of the medical interaction has actually changed, patients should be able to perceive this change in doctor-patient communication over time.

Changes in quality of doctor-patient communication

## Methods

We compared quality assessments of GP observers and patient observers across two time periods. The first cohort consists of consultations videotaped in 1982-1984. The second cohort was videotaped in 2000-2001.

### *Videotaped consultations*

Based on the International Classification of Primary Care (ICPC), we selected videotaped consultations with hypertension patients (ICPC-codes K85-K87) from a larger dataset of two cohorts of random general practice consultations. The first cohort consisted of all hypertension consultations, selected from a random sample of 1569 videotaped consultation in 1982-1984 (n=103) [7,25-27]. However, due to the deterioration in the technical quality of some videotaped consultations, only 81 consultations (recorded by 23 GPs) were useable for the quality assessments. The second dataset was recorded in 2000-2001 (n=2794) and consisted also from a random sample of general practice consultations [7,28]. From this dataset, we selected **every first** hypertension consultation from each of the 108 participating GPs (n=108).

The patients in the selected consultations showed no differences in age and gender between the two study samples. The mean age was 58.5 (sd = 14.80) and 61.4 (sd = 14.66) years, respectively (*n.s.*) and 65% versus 63% of the sample was female (*n.s.*). In both samples the vast majority of the consultations were repeat visits. All physicians in the selected consultations were specialized in general practice and the majority (92% versus 94%) had more than 5 years experience. In the first study sample (1982-1984), all of the physicians (N = 23) were male and in the second study sample (2000-2001), 80 physicians were male and 28 were female (74% versus 26%). In the Netherlands, routine care for hypertension patients is delivered in general practice. The study was carried out in accordance with Dutch privacy legislation. All participating physicians and patients who were videotaped during their consultation gave their informed consent.

### *Quality assessment by general practitioners (GP observers)*

## Changes in quality of doctor-patient communication

1  
2  
3 In 1987, twelve GP observers (age 30-70; 4 female and 8 male physicians) were asked to rate the  
4 selected consultations from the first cohort (videotaped in 1982-1984). These GP observers had a  
5 minimum of five years experience in practice. The procedure in this first cohort of peer assessments  
6 has been described previously [15]. In 2002, the second cohort of selected consultations (videotaped  
7 in 2000-2001) was individually rated by a new group of twelve GP observers (age 36-62; 6 female and  
8 6 male physicians). These GP observers also had a minimum of five years experience in practice.  
9 Both groups of GP observers were drawn from the Dutch National Register of General Practitioners  
10 and recruited by mail or telephone. None of the GP observers were in any way involved in the  
11 collected videotaped consultations.  
12  
13  
14  
15  
16  
17  
18  
19  
20

21 In both cohorts, each consultation was observed and rated by all twelve GP observers on  
22 three dimensions of quality of care. A scale from 1 (very poor) to 10 (excellent) was used. The  
23 dimensions assessed by the general practitioners were 1) medical technical quality of care, 2)  
24 psychosocial quality of care, and 3) quality of interpersonal behaviour (doctor-patient relationship).  
25 The GP observers received a short training program about the rating scale and the different  
26 dimensions of quality of care. For the assessments of the medical technical dimension, they were  
27 instructed to take into account the then current best practice for hypertension [29,30]. The  
28 psychosocial dimension referred to the way non-somatic aspects related to the complaint were  
29 addressed, such as stress-related factors in the origin of hypertension and the psychosocial problems  
30 caused by hypertension or its treatment; and interpersonal quality referred exclusively to the way in  
31 which the GP succeeded to build an open en secure relationship with the patient. All GP observers  
32 signed a statement of confidentiality before starting the assessments.  
33  
34  
35  
36  
37  
38  
39  
40  
41  
42  
43  
44  
45  
46  
47  
48  
49  
50  
51  
52  
53  
54  
55  
56  
57  
58  
59  
60

*Quality assessment by patient observers with hypertension*

61 Patient observers with hypertension rated videotaped consultations of both cohorts individually in the  
62 period from April 2010 to July 2010. People were recruited through advertisements on health related  
63 internet web pages as well as via flyers placed in health care settings (general practices,  
64 pharmacists). Participants who had previously been involved in other health research projects  
65 conducted by NIVEL were actively approached by mail. All patient observers met the following criteria:  
66 diagnosed with hypertension by a physician, consulted the general practitioner at least once in the  
67  
68  
69  
70

Changes in quality of doctor-patient communication

past year, not involved in a health care related lawsuit or legal complaint procedure, and being able to understand and speak the Dutch language.

In total, 108 patient observers with hypertension (age 24-80; 73 female and 35 male observers) completed the patient assessments of the videotaped consultations. See Table 1 for background characteristics of the patient observers. Each patient observer observed 8-12 consultations (randomly assigned from both cohorts, but with a total duration of approximately 90 minutes) in order for each consultation in the sample to be rated 5 or 6 times. The patient observers individually rated the same three dimensions of quality of care as the GP observers and received a comparable short training program. For the medical technical dimension, patient observers were instructed to consider the clarity of any medical explanations given by the general practitioner. For the other two dimensions, they received the same instruction as the GP observers. We noticed that patients could easily relate to these aspects of hypertension care and were therefore capable to distinguish all three dimensions based on their experiential knowledge. All patient observers signed a statement of confidentiality before starting the assessments.

[insert Table 1]

### *Statistical analyses*

To account for the multilevel structure of quality assessments nested within videotaped consultations and individual observers, multilevel regression analysis was applied. The categories cohort (0 = 1982-1984 and 1 = 2000-2001) and observer type (0 = patient observers and 1 = GP observers) were coded as dummy variables. First, the associations between the three dimensions of quality of care were examined. Second, it was tested whether a change over time in quality assessments occurred and whether the quality assessments of patient observers and GP observers were comparable.

### Results

#### *Associations between the three dimensions of quality of care*

The quality assessments correlated positively between the three different dimensions of quality of care for each observation period and for GPs and patients as well (see Table 2). Furthermore, analysis

## Changes in quality of doctor-patient communication

revealed that the overall quality assessments of interpersonal behaviour were higher compared to the medical technical dimension ( $T(5258) = 2.79, p < .01$ ); and the medical technical dimension received higher quality assessments than the psychosocial dimension ( $T(5249) = 6.80, p < .001$ ).

[insert Table 2]

*Changes in quality assessments over time*

The assessments of the second cohort (2000-2001) were higher compared to the first cohort (1982-1984) for the three dimensions (see Figure 1). The multilevel regression analyses showed significant effects of cohort in all three dimensions: medical technical quality ( $B = 0.58, Z = 5.43, p < .001$ ), psychosocial quality ( $B = 0.35, Z = 2.36, p < .05$ ), and quality of interpersonal behaviour ( $B = 0.50, Z = 3.64, p < .001$ ).

[insert Figure 1]

*Comparing patient observers' and GP observers' assessments*

The figure shows that the assessments of GP observers were somewhat lower than assessments of patient observers; however, in none of the three dimensions was this difference found to be significant: medical technical quality ( $B = -0.36, Z = 1.89, n.s.$ ), psychosocial quality ( $B = -0.19, Z = 0.93, n.s.$ ), and quality of interpersonal behaviour ( $B = -0.24, Z = 1.55, n.s.$ ).

When examining the variance of the quality assessments, the standard deviations of the assessments by patient observers and GP observers in the second cohort were smaller than the first cohort on all three dimensions (for patient observers; medical technical quality:  $F(478, 528) = 1.18, p < .05$ , psychosocial quality:  $F(480, 528) = 1.20, p < .05$ , quality of interpersonal behaviour:  $F(479, 537) = 1.30, p < .01$  and for GP observers; medical technical quality:  $F(327, 1288) = 2.03, p < .001$ , psychosocial quality:  $F(326, 1288) = 2.71, p < .001$ , quality of interpersonal behaviour:  $F(327, 1288) = 2.26, p < .001$ ). Furthermore, all standard deviations in the assessments of GP observers were smaller compared to the patient observers in the first cohort (medical technical quality:  $F(478, 327) = 1.83, p < .001$ , psychosocial quality:  $F(480, 326) = 1.59, p < .001$ , quality of interpersonal behaviour:  $F(479,$

Changes in quality of doctor-patient communication

327) = 1.64,  $p < .001$ ) and second cohort (medical technical quality:  $F(528, 1288) = 3.14, p < .001$ , psychosocial quality:  $F(528, 1288) = 3.58, p < .001$ , quality of interpersonal behaviour:  $F(537, 1288) = 2.85, p < .001$ ).

In the model with the assessment of medical technical quality, the intraclass correlation on video level was 14% and on observer level 32%. For psychosocial quality, video level contained 26% and observer level 27% of the variance; for quality of interpersonal behaviour we calculated a variance of 27% on video level and 18% on observer level.

## Discussion

Hypertension consultations in general practice in the Netherlands received higher quality assessments by general practitioners and patients on medical technical quality, psychosocial quality and the quality of interpersonal behaviour in 2000-2001 as compared to the 1980s. The three dimensions of quality were moderately to highly correlated, so there was internal consistency in the quality assessments within consultations. The assessments of interpersonal quality were higher than the assessments on the other two dimensions, which supports the central role of the doctor-patient relationship in the medical interaction between general practitioners and their patients. GP and patient observers agreed on the improved quality of the consultations, but GP observers showed less variation in their assessments than patient observers. There was also less variation in the assessments of the second cohort compared to the first cohort, which implies that there is greater consensus on the quality of the more recent consultations.

### *Standardized care in general practice*

Our findings indicate that in this particular sample of videotaped hypertension visits, the shift towards a more task-oriented communication style [7] did not jeopardize the individual attention for the patient, since not only medical technical quality, but also psychosocial quality and the quality of interpersonal behaviour received higher quality assessments over time. These results are remarkable because patients and doctors shared less concerns and less process-oriented talk (partnership building and directions) in more recent consultations [7]. Apparently, these shifts in communication styles do not necessarily lead to a decline in perceived quality of GPs' communication. While this probably could be

## Changes in quality of doctor-patient communication

1  
2  
3 expected from the GP observers (the quality measures were highly interrelated, suggesting a certain  
4  
5 'Halo-effect'), we had expected that patients would prefer the older videotapes in which the GP was  
6  
7 less instrumental. Several studies demonstrate the importance patients attach to GPs' affective  
8  
9 communication [31,32]. This seemingly contradictory result needs further examination, for example in  
10  
11 qualitative focus groups. Another important finding is the smaller variability in the quality assessments  
12  
13 of general practitioners in the latter cohort, which can be considered as a sign that professionals are  
14  
15 successfully assisted by clinical guidelines to assess the quality of care. There seems to be better  
16  
17 consensus between general practitioners on what can be considered a 'good' consultation in respect  
18  
19 of the more recent consultations.  
20

*Tailored approach to doctor-patient communication*

21  
22  
23  
24 In contrast with the GP observer assessments, there was a relatively high variance on the patient  
25  
26 observer level, indicating large individual differences between patient observers.  
27

28  
29 However, this is understandable since patient observers in particular base their ratings on experiential  
30  
31 knowledge that can differ greatly between patients. Moreover, several studies show that patient  
32  
33 preferences vary widely [33,34]. Therefore, the high variability between patients calls for a patient-  
34  
35 centred and individually tailored approach to doctor-patient communication in general practice.  
36

*Strengths and limitations of the study*

37  
38  
39  
40 A strong point of the current study is that we examined medical interactions using videotaped real-life  
41  
42 general practice consultations with hypertension patients from two distinct time periods. Thus, the  
43  
44 findings refer to actual behaviour, as perceived by uninvolved observers. In addition, the videotaped  
45  
46 participants were not aware of the fact that the analyses would focus on hypertension consultations.  
47  
48 Video recording is a valid method to examine doctor-patient communication: the influence of the video  
49  
50 recorder on participants' behaviour is marginal [35]. Moreover, the inclusion of both the professionals'  
51  
52 and the patients' perspective enables a comprehensive view on quality of care. The observers were  
53  
54 either experienced GPs or experienced patients (hypertension patients who visit their general  
55  
56 practitioner regularly), so they were well able to relate to the videotaped consultations. In addition, we  
57  
58 matched the medical condition of the patient observers with the patients in the videotaped  
59  
60 consultations. Previous studies show that lay people (experienced patients) are well able to rate



Changes in quality of doctor-patient communication

videotaped doctor-patient interactions and have an added value over ratings given exclusively by professionals or researchers [34,36,37].

A possible weakness of the study is that the assessments of the professionals were executed by contemporary peers, while the assessments of patients were performed retrospectively. The GP observers judged the video-taped consultations in the same time period in which the consultations took place. Therefore, the context in which the GP observers rated the consultations changed between the two cohorts. Although identical instructions to the two groups of GP observers was guaranteed because one of the authors (JB) was involved in both previous studies [7,15], we can not avoid a time and context related effect of the GP assessments. In contrast, the patient observers judged video-taped consultations that took place approximately 10 or 30 years ago. The context in which their ratings were conducted did not change between the two cohorts, but was also influenced by current knowledge and experience. Since it can be argued that expectations of what is considered a 'good' consultation are also subject to change over time, we cannot automatically assume that quality assessments would have been identical if patient observers also rated the consultations in the same time period as the recording of the consultations. However, the concurrence of assessments of patient observers and GP observers in their different contexts reinforces our conclusions. Another possible weakness is that the majority of consultations were hypertension repeat visits. A concern with hypertension repeat visits may be that these visits do not sufficiently address psychosocial care due to time constraints or the nature of the problem. However, attention to psychosocial aspects does not have to be time intensive [38]. In addition, the fact that patients are already familiar with the GP in repeat visits could also stimulate patients to voice their concerns. Nevertheless, we need to be cautious with the generalization of our findings.

This study shows that although there is an increased emphasis on task-oriented care in general practice, there is a higher perceived quality of doctor-patient communication in more recent consultations on different dimensions; not only on the medical technical care, but also on the psychosocial aspects and the doctor-patient relationship. The next step in this line of research is to unravel the factors that determine patients' quality assessments of doctor-patient communication.

*Acknowledgements*

## Changes in quality of doctor-patient communication

1  
2  
3 We thank the GP observers and patient observers who made the assessments. We are grateful to the  
4  
5 general practitioners and the patients who participated in the study. We also thank Peter  
6  
7 Spreeuwenberg for the statistical advice.  
8

9 Funding: This work was supported by the Dutch Ministry of Education, Culture and Science.  
10  
11 The previous studies in which the recording of the consultations were performed were financed by the  
12  
13 Dutch Ministry of Health, Welfare and Sport, the Netherlands Organisation for Health Research and  
14  
15 Development (ZonMw) and the research fund of the Innovation Fund of Health Insurers (RVVZ).  
16

17 Competing interest: The authors declare that they have no competing interests.  
18

19 Ethical approval: The studies were carried out according to Dutch privacy legislation. The  
20  
21 privacy regulation was approved by the Dutch Data Protection Authority. According to Dutch  
22  
23 legislation, approval by a medical ethics committee was not required for these observational studies.  
24

25 Contribution: LB coordinated the patient observers' assessments, formulated the study  
26  
27 questions, discussed core ideas, analysed the data, and wrote the paper. PV designed the original  
28  
29 study, discussed core ideas, and edited the paper. FT coordinated the second cohort GP observers'  
30  
31 assessments, and commented on the paper. JB coordinated the first cohort GP observers'  
32  
33 assessments, designed the original study, discussed core ideas, and edited the paper. All authors  
34  
35 approved the final submitted version of the manuscript.  
36

37 Data sharing statement: Consent for data sharing was not obtained from study participants,  
38  
39 but the presented data are anonymised and there is no risk of identification. Access to the dataset is  
40  
41 available from the corresponding author (l.butalid@nivel.nl) in STATA format for academic  
42  
43 researchers interested in undertaking a formally agreed collaborative research project.  
44  
45  
46  
47  
48  
49  
50  
51  
52  
53  
54  
55  
56  
57  
58  
59  
60

## Changes in quality of doctor-patient communication

## References

- [1] Lain C, Davidoff F. Patient-centered medicine. A professional evolution. *JAMA*, 1996;275:152-6.
- [2] McWhinney IR. Primary care: core values. Core values in a changing world. *BMJ*, 1998;316:1807-9.
- [3] Smith R. All changed, changed utterly. British medicine will be transformed by the Bristol case. *BMJ*, 1998;316:1917-8.
- [4] Bensing J. Bridging the gap. The separate worlds of evidence-based medicine and patient-centered medicine. *Patient Educ Couns*, 2000;39:17-25.
- [5] Van den Brink-Muinen A, Van Dulmen SM, De Haes HCJM, Visser A, Schellevis FG, Bensing JM. Has patients' involvement in the decision-making process changed over time? *Health Expect*, 2006;9:333-342.
- [6] Bensing JM, Verhaak PFM. Communication in medical encounters. In: Kaptein A, Weinman J. (ed). *Health Psychology*. Oxford: Blackwell Publishing Ltd, 2004
- [7] Bensing JM, Tromp F, Van Dulmen S, Van den Brink-Muinen A, Verheul W, Schellevis FG. Shifts in doctor-patient communication between 1986 and 2002: a study of videotaped General Practice consultations with hypertension patients. *BMC Fam Pract*, 2006;7:62-8.
- [8] Noordman J, Verhaak P, Van Beljouw I, Van Dulmen S. Consulting room computers and their effect on GP-patient communication: comparing two periods of computer use. *Fam Pract*, 2010;27:644-51.
- [9] Campbell SM, Roland MO, Middleton E, Reeves D. Improvements in quality of clinical care in English general practice 1998-2003: longitudinal observational study. *BMJ*, 2005;331:1121
- [10] Reid CM, Ryan P, Miles H, Wilson K, Beilin LJ, Brown MA, Jennings GL, Johnston CI, Macdonald GJ, Marley JE, McNeil JJ, Morgan TO, West MJ, Wing LM. Who's really hyperetnsive? Quality control issues in the assessment of blood pressure for randomized trials. *Blood Press*, 2005;14:133-8.
- [11] Grol R, Polleman M, Verheij T. De meerjarige beroepsopleiding tot huisarts. II: 'Structuurplan' en onderwijsdoelen [The multi-year training for GPs. II: 'Structure' and goals], *Medisch Contact*, 1986;41:539-44.

## Changes in quality of doctor-patient communication

- 1  
2  
3 [12] Kramer AWM, Düsman H, Tan LHC, Jansen KJM, Grol RPTM and van der Vleuten CPM.  
4  
5 Effect of extension of postgraduate training in general practice on the acquisition of knowledge  
6  
7 of trainees. *Fam Pract*, 2003;20:207-12.  
8  
9 [13] Barrat A. Evidence based medicine and shared decision making: The challenge of getting both  
10  
11 evidence and preferences in to health care. *Patient Educ Couns*, 2008;73:407-12.  
12  
13 [14] Krahn M., Naglie G. The next step in guideline development. Incorporating patient  
14  
15 preferences. *JAMA*, 2008;300:436-8.  
16  
17 [15] Bensing JM. *Doctor-patient communication and the quality of care: an observation study into*  
18  
19 *affective and instrumental behaviour in general practice*. Utrecht: NIVEL, 1991 [dissertation]  
20  
21 [16] Bunker SJ, Colquhoun DM, Esler MD, Hickie IB, Hunt D, Jelinek VM, Oldenburg BF, Peach  
22  
23 HG, Ruth D, Tennant CC, Tonkin AM. 'Stress' and coronary heart disease: psychosocial risk  
24  
25 factors. *Med J Aust*, 2003;178:272-6.  
26  
27 [17] Hill MN, Miller NH, De Geest S, American Society of Hypertension Writing Group. Adherence  
28  
29 and persistence with taking medication to control high blood pressure. *J Am Soc Hypertens*,  
30  
31 2011;5:56-63.  
32  
33 [18] Cooper LA, Roter DL, Bone LR, Larson SM, Miller ER, Barr MS, Carson KA, Levine DM. A  
34  
35 randomized controlled trial of intervention to enhance patient-physician partnership, patient  
36  
37 adherence and high blood pressure control among ethnic minorities and poor persons: a study  
38  
39 protocol NCT00123045. *Implement Sci*, 2009;4:7-22.  
40  
41 [19] White KL. *The task of medicine: dialogue at Wickenburg*. Menlo Park: The Henry J. Kaiser  
42  
43 Family Foundation, 1998.  
44  
45 [20] Stewart M, Roter D. (ed). *Communicating with medical patients*. Newbury Park: Sage  
46  
47 Publications, 1989  
48  
49 [21] Epstein RM, Street RL. *Patient-centered communication in cancer care: promoting healing*  
50  
51 *and reducing suffering*. Bethesda: National Cancer Institute NIH, 2007  
52  
53 [22] Caron-Flinterman JF, Broerse JEW, Bunders JFG. The experiential knowledge of patients: a  
54  
55 new resource for biomedical research? *Soc Sci Med*, 2005;60:2575-84.  
56  
57 [23] Britten N. Patients' ideas about medicines: a qualitative study in a general practice population.  
58  
59 *Br J Gen Pract*, 1994;44:465-8.  
60

## Changes in quality of doctor-patient communication

- 1  
2  
3  
4 [24] Brody DS, Khaliq AM, Thompson TL. Patients' perspectives on the management of emotional  
5 distress in primary care settings. *J Gen Intern Med*, 1997;12:403-6.  
6  
7 [25] Verhaak PFM. Detection of psychologic complaints by general practitioners. *Med Care*,  
8 1988;26:1009-20. '  
9  
10 [26] Bensing J. Doctor-patient communication and the quality of care. *Soc Sci Med*, 1991;32:1301-  
11 10.  
12  
13 [27] Bensing J, Dronkers, J. Instrumental and affective aspects of physician behavior. *Med Care*,  
14 1992;30:283-98.  
15  
16 [28] Van den Brink-Muinen A, Van Dulmen AM, Schellevis FG, Bensing JM. *Tweede Nationale*  
17 *Studie naar ziekten en verrichtingen in de huisartspraktijk: oog voor communicatie: huisarts-*  
18 *patiënt communicatie in Nederland*. [The second National Study of diseases and actions in  
19 general practice: an eye for communication: doctor-patient communication in the Netherlands]  
20 Utrecht: NIVEL, 2004  
21  
22 [29] Nederlands Huisartsen Genootschap [Dutch College of General Practitioners]. *Huisarts &*  
23 *praktijk: hypertensie. Huisarts en wetenschap [General Practitioner & Practice: Hypertension.*  
24 *General Practitioner and Science]*, June 1977.  
25  
26 [30] Geijer RMM, Burgers JS, Van der Laan JR, Wiersma T, Rosmalen CFH, Thomas S: NHG-  
27 Standaard Hypertensie, tweede herziening. NHG-standaarden voor de huisarts, deel 1  
28 [Clinical guideline for hypertension of the Dutch College of General Practitioners, second  
29 revision. Clinical guidelines for the practitioner, part 1]. Maarssen: Elsevier/Bunge 1999:187-  
30 205.  
31  
32 [31] Williams S, Weinman J, Dale J. Doctor-patient communication and patient satisfaction: a  
33 review. *Fam Pract*, 1998;15:480-92.  
34  
35 [32] Cape J, McCulloch Y. Patients' reasons for not presenting emotional problems in general  
36 practice consultations. *Br J Gen Pract*, 1999;49:875-9.  
37  
38 [33] Kiesler DJ, Auerbach SM. Optimal matches of patient preferences for information, decision-  
39 making and interpersonal behaviour: Evidence, models and interventions. *Patient Educ*  
40 *Couns*, 2006;61:319-41.  
41  
42 [34] Swenson SL, Zettler P, Lo B. 'She gave it her best shot right away': Patient experiences of  
43 biomedical and patient-centered communication. *Patient Educ Couns*, 2006;61:200-11.  
44  
45  
46  
47  
48  
49  
50  
51  
52  
53  
54  
55  
56  
57  
58  
59  
60

## Changes in quality of doctor-patient communication

- 1  
2  
3 [35] Arborelius E, Timpka T. In what way may videotapes be used to get significant information  
4 about the patient-physician relationship? *Med Teach*, 1990;12:197-208.  
5  
6  
7 [36] Mazor KM, Ockene JK, Rogers HJ, Carlin MM, Quirk ME. The relationship between checklist  
8 scores on a communication OSCE and analogue patients' perceptions of communication. *Adv*  
9 *Health Sci Educ Theory Pract*, 2005;10:37-51.  
10  
11  
12 [37] Moretti F, Van Vliet L, Bensing J, Deledda G, Mazzi M, Rimondini M, Zimmerman C, Fletcher  
13 I. A standardized approach to qualitative content analysis of focus group discussions from  
14 different countries. *Patient Educ Couns*, 2011;82:420-8.  
15  
16  
17 [38] Fogarty LA, Curbow BA, Wingard JR, McDonnell K, Somerfield MR. Can 40 seconds of  
18 compassion reduce patient anxiety? *J Clin Oncol*, 1999;17:371-9.  
19  
20  
21  
22  
23  
24  
25  
26  
27  
28  
29  
30  
31  
32  
33  
34  
35  
36  
37  
38  
39  
40  
41  
42  
43  
44  
45  
46  
47  
48  
49  
50  
51  
52  
53  
54  
55  
56  
57  
58  
59  
60

## Changes in quality of doctor-patient communication

Table 1 Background characteristics of the patient observers

| Background characteristics                   | Patient observers with hypertension (N = 108) |
|----------------------------------------------|-----------------------------------------------|
| Gender                                       |                                               |
| Female                                       | 73 (68%)                                      |
| Male                                         | 35 (32%)                                      |
| Age                                          |                                               |
| < 40                                         | 2 (2%)                                        |
| 40 – 49                                      | 12 (11%)                                      |
| 50 – 59                                      | 46 (43%)                                      |
| 60 – 69                                      | 39 (36%)                                      |
| 70 – 79                                      | 9 (8%)                                        |
| Education level                              |                                               |
| Primary education                            | 2 (2%)                                        |
| Secondary education                          | 59 (66%)                                      |
| Third-level education                        | 47 (31%)                                      |
| Employment                                   |                                               |
| Retired                                      | 35 (32%)                                      |
| Employed                                     | 31 (29%)                                      |
| Self-employed                                | 5 (5%)                                        |
| Other (student, housewife, job seeker)       | 37 (34%)                                      |
| Native background                            |                                               |
| Dutch                                        | 96 (89%)                                      |
| First generation migrant                     | 6 (5.5%)                                      |
| Second generation migrant                    | 6 (5.5%)                                      |
| Health                                       |                                               |
| Using medication for hypertension            | 81 (75%)                                      |
| Co morbidity other chronic disease           | 50 (46%)                                      |
| Health care use                              |                                               |
| Contact with GP in last two months           | 76 (70%)                                      |
| Contact with medical specialist in past year | 72 (67%)                                      |

Table 2 Associations (*Pearson's r*) between the three dimensions of quality of care

|                     |                                        |                   | Medical technical | Psychosocial | Interpersonal |
|---------------------|----------------------------------------|-------------------|-------------------|--------------|---------------|
| Cohort<br>1982-1984 | All quality<br>assessments             | Medical technical | -                 |              |               |
|                     |                                        | Psychosocial      | .66               | -            |               |
|                     |                                        | Interpersonal     | .63               | .80          | -             |
|                     | Assessments<br>of GP<br>observers      | Medical technical | -                 |              |               |
|                     |                                        | Psychosocial      | .54               | -            |               |
|                     |                                        | Interpersonal     | .51               | .79          | -             |
|                     | Assessments<br>of patient<br>observers | Medical technical | -                 |              |               |
|                     |                                        | Psychosocial      | .70               | -            |               |
|                     |                                        | Interpersonal     | .68               | .77          | -             |
| Cohort<br>2000-2001 | All quality<br>assessments             | Medical technical | -                 |              |               |
|                     |                                        | Psychosocial      | .58               | -            |               |
|                     |                                        | Interpersonal     | .64               | .76          | -             |
|                     | Assessments<br>of GP<br>observers      | Medical technical | -                 |              |               |
|                     |                                        | Psychosocial      | .55               | -            |               |
|                     |                                        | Interpersonal     | .56               | .77          | -             |
|                     | Assessments<br>of patient<br>observers | Medical technical | -                 |              |               |
|                     |                                        | Psychosocial      | .62               | -            |               |
|                     |                                        | Interpersonal     | .71               | .76          | -             |

## Changes in quality of doctor-patient communication

1  
2  
3 [see Powerpoint document]  
4  
5

6 Figure 1 Means (and 95% CI) of assessments of medical technical quality, psychosocial quality  
7 and quality of interpersonal behaviour  
8  
9  
10  
11  
12  
13  
14  
15  
16  
17  
18  
19  
20  
21  
22  
23  
24  
25  
26  
27  
28  
29  
30  
31  
32  
33  
34  
35  
36  
37  
38  
39  
40  
41  
42  
43  
44  
45  
46  
47  
48  
49  
50  
51  
52  
53  
54  
55  
56  
57  
58  
59  
60

For peer review only



1  
2  
3  
4  
5  
6  
7  
8  
9  
10  
11  
12  
13  
14  
15  
16  
17  
18  
19  
20  
21  
22  
23  
24  
25  
26  
27  
28  
29  
30  
31  
32  
33  
34  
35  
36  
37  
38  
39  
40  
41  
42  
43  
44  
45  
46  
47  
48  
49  
50  
51  
52  
53  
54  
55  
56  
57  
58  
59  
60

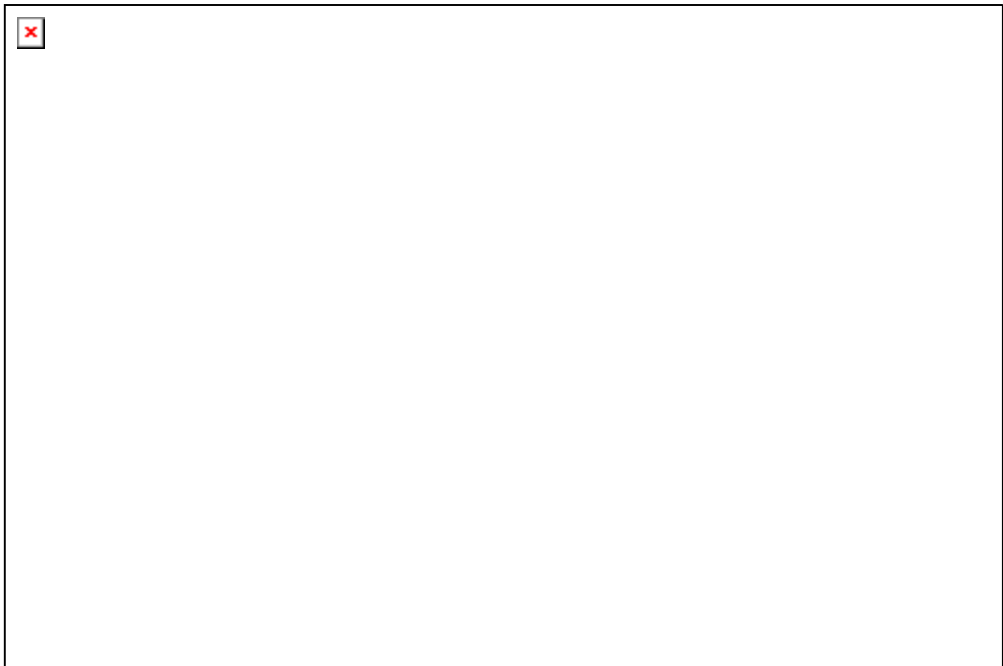

Means (and 95% CI) of assessments of medical technical quality, psychosocial quality and quality of interpersonal behaviour  
81x54mm (300 x 300 DPI)

view only

STROBE 2007 (v4) checklist of items to be included in reports of *cross-sectional studies*

| Section/Topic             | Item # | Recommendation                                                                                                                                                                                    | Reported on page # |
|---------------------------|--------|---------------------------------------------------------------------------------------------------------------------------------------------------------------------------------------------------|--------------------|
| Title and abstract        | 1      | (a) Indicate the study's design with a commonly used term in the title or the abstract                                                                                                            | 1,2                |
|                           |        | (b) Provide in the abstract an informative and balanced summary of what was done and what was found                                                                                               | 2                  |
| <b>Introduction</b>       |        |                                                                                                                                                                                                   |                    |
| Background/rationale      | 2      | Explain the scientific background and rationale for the investigation being reported                                                                                                              | 4,5                |
| Objectives                | 3      | State specific objectives, including any pre-specified hypotheses                                                                                                                                 | 4,5                |
| <b>Methods</b>            |        |                                                                                                                                                                                                   |                    |
| Study design              | 4      | Present key elements of study design early in the paper                                                                                                                                           | 5                  |
| Setting                   | 5      | Describe the setting, locations, and relevant dates, including periods of recruitment, exposure, follow-up, and data collection                                                                   | 5-7                |
| Participants              | 6      | Give the eligibility criteria, and the sources and methods of selection of participants                                                                                                           | 5,6                |
| Variables                 | 7      | Clearly define all outcomes, exposures, predictors, potential confounders, and effect modifiers. Give diagnostic criteria, if applicable                                                          | 6,7                |
| Data sources/ measurement | 8*     | For each variable of interest, give sources of data and details of methods of assessment (measurement). Describe comparability of assessment methods if there is more than one group              | 5-7                |
| Bias                      | 9      | Describe any efforts to address potential sources of bias                                                                                                                                         | 5-7                |
| Study size                | 10     | Explain how the study size was arrived at                                                                                                                                                         | 5                  |
| Quantitative variables    | 11     | Explain how quantitative variables were handled in the analyses. If applicable, describe which groupings were chosen and why                                                                      | 7                  |
| Statistical methods       | 12     | (a) Describe all statistical methods, including those used to control for confounding                                                                                                             | 7                  |
|                           |        | (b) Describe any methods used to examine subgroups and interactions                                                                                                                               | 7                  |
|                           |        | (c) Explain how missing data were addressed                                                                                                                                                       | 7                  |
|                           |        | (d) If applicable, describe analytical methods taking account of sampling strategy                                                                                                                | n/a                |
|                           |        | (e) Describe any sensitivity analyses                                                                                                                                                             | 7                  |
| <b>Results</b>            |        |                                                                                                                                                                                                   |                    |
| Participants              | 13*    | (a) Report numbers of individuals at each stage of study—eg numbers potentially eligible, examined for eligibility, confirmed eligible, included in the study, completing follow-up, and analysed | 7                  |
|                           |        | (b) Give reasons for non-participation at each stage                                                                                                                                              | n/a                |

|                          |     |                                                                                                                                                                                                              |              |
|--------------------------|-----|--------------------------------------------------------------------------------------------------------------------------------------------------------------------------------------------------------------|--------------|
|                          |     | (c) Consider use of a flow diagram                                                                                                                                                                           | n/a          |
| Descriptive data         | 14* | (a) Give characteristics of study participants (eg demographic, clinical, social) and information on exposures and potential confounders                                                                     | 5,6, Table 1 |
|                          |     | (b) Indicate number of participants with missing data for each variable of interest                                                                                                                          | n/a          |
| Outcome data             | 15* | Report numbers of outcome events or summary measures                                                                                                                                                         | 7,8          |
| Main results             | 16  | (a) Give unadjusted estimates and, if applicable, confounder-adjusted estimates and their precision (eg, 95% confidence interval). Make clear which confounders were adjusted for and why they were included | 8, Figure 1  |
|                          |     | (b) Report category boundaries when continuous variables were categorized                                                                                                                                    | 8, Figure 1  |
|                          |     | (c) If relevant, consider translating estimates of relative risk into absolute risk for a meaningful time period                                                                                             | n/a          |
| Other analyses           | 17  | Report other analyses done—eg analyses of subgroups and interactions, and sensitivity analyses                                                                                                               | 7,8, Table 2 |
| <b>Discussion</b>        |     |                                                                                                                                                                                                              |              |
| Key results              | 18  | Summarise key results with reference to study objectives                                                                                                                                                     | 9            |
| Limitations              | 19  | Discuss limitations of the study, taking into account sources of potential bias or imprecision. Discuss both direction and magnitude of any potential bias                                                   | 10,11        |
| Interpretation           | 20  | Give a cautious overall interpretation of results considering objectives, limitations, multiplicity of analyses, results from similar studies, and other relevant evidence                                   | 10,11        |
| Generalisability         | 21  | Discuss the generalisability (external validity) of the study results                                                                                                                                        | 10,11        |
| <b>Other information</b> |     |                                                                                                                                                                                                              |              |
| Funding                  | 22  | Give the source of funding and the role of the funders for the present study and, if applicable, for the original study on which the present article is based                                                | 11           |

\*Give information separately for cases and controls in case-control studies and, if applicable, for exposed and unexposed groups in cohort and cross-sectional studies.

**Note:** An Explanation and Elaboration article discusses each checklist item and gives methodological background and published examples of transparent reporting. The STROBE checklist is best used in conjunction with this article (freely available on the Web sites of PLoS Medicine at <http://www.plosmedicine.org/>, Annals of Internal Medicine at <http://www.annals.org/>, and Epidemiology at <http://www.epidem.com/>). Information on the STROBE Initiative is available at [www.strobe-statement.org](http://www.strobe-statement.org).
